# Supplementary material for: Comprehensive characterization of cell-free tumor DNA in plasma and urine of patients with renal tumors
Source: Genome Med. 2020 Feb 28;12:23. doi: 10.1186/s13073-020-00723-8 (PMC7048087; doi:10.1186/s13073-020-00723-8)
Supplement: Supplementary file 3 — Table S8. Summary of all mutation data of the MonReC cohort. [file 13073_2020_723_MOESM3_ESM.xlsx]

## Sheet: Tabelle1
TRUE	+ detected in the duplicates; mean of VAF, DB from QS caller
FALSE	+/- detected in one duplicate; mean of VAF, DB from QS caller and IGV output
BAM only	- visible only in BAM Files; mean of VAF, DP from IGV output
Patient ID	Genome-wide z-score	ichorCNA tumour fraction [%]	ichorCNA tumour fraction [%] subsampled	ichorCNA tumour fraction [%] 90-150bp	Chromosome	Position	RefSeq	Gene	HGVS.c	HGVS.p	VAF1 [%]	DP2	Found in both duplicates	Coverage mean [IGV]	WT reads mean [IGV]	Mut reads mean [IGV]	Indel mean [IGV]	Coverage pDNA1	WT reads pDNA1	Mut reads pDNA1	Indel pDNA1	Coverage pDNA2	WT reads pDNA2	Mut reads pDNA2	Indel pDNA2
K05_1	0.3	5.484	5.935	8.69	chr17	7577580	NM_000546.5	TP53	c.701A>G	p.Tyr234Cys	7.1	12958.5	TRUE	12958.5	11987.5	924		11013	10142	832		14904	13833	1016
K11_1	2.49	0	1.94	4.404	chr3	10183872	NM_000551.3	VHL	c.340+1G>A		0.664325	12235	BAM only	12235	12117	79.5		12677	12588	57		11793	11646	102
K11_1					chr3	47059145	NM_014159.6	SETD2	c.7516A>G	p.Lys2506Glu	0.606691	5241	BAM only	5241	5191.5	35.5		6231	6150	63		4251	4233	8
K11_1					chr3	52436662	NM_004656.3	BAP1	c.2012A>G	p.Tyr671Cys	2.10189	10471	BAM only	10471	10194.5	213		10824	10568	186		10118	9821	240
K11_1					chrX	53223327	NM_004187.3	KDM5C	c.4003_4031del	p.Pro1335Alafs*2	1.3349	4619.5	BAM only	4619.5			61.5	4606			118	4633			5
K11_2	-0.231796	0	2.037	5.291	chr3	10183872	NM_000551.3	VHL	c.340+1G>A		0.500482	15505.5	BAM only	15505.5	15378.5	72		16537	16463	7		14474	14294	137
K11_2					chr3	47059145	NM_014159.6	SETD2	c.7516A>G	p.Lys2506Glu	0.386467	4787	BAM only	4787	4738	18		4500	4450	22		5074	5026	14
K11_2					chr3	52436662	NM_004656.3	BAP1	c.2012A>G	p.Tyr671Cys	0.93131	9945	FALSE	9945	9751	111.5		9936	9794	60		9954	9708	163
K11_2					chrX	53223327	NM_004187.3	KDM5C	c.4003_4031del	p.Pro1335Alafs*2	0.335144	6099	BAM only	6099			20	6347			10	5851			30
K11_3	1.25922	0	1.727	4.293	chr3	10183872	NM_000551.3	VHL	c.340+1G>A		0.957668	9761	FALSE	9533	9379	105.5		4729	4551	125		14337	14207	86
K11_3					chr3	47059145	NM_014159.6	SETD2	c.7516A>G	p.Lys2506Glu	1.31585	3801.5	BAM only	3801.5	3732.5	47		2368	2320	34		5235	5145	60
K11_3					chr3	52436662	NM_004656.3	BAP1	c.2012A>G	p.Tyr671Cys	1.735	8863	TRUE	8863	8656	130.5		4729	4551	125		12997	12761	136
K11_3					chrX	53223327	NM_004187.3	KDM5C	c.4003_4031del	p.Pro1335Alafs*2	1.32962	4780	FALSE	4525			111.5	2370			27	6680			196
K11_4	0.955163	0	4.373	6.715	chr3	10183872	NM_000551.3	VHL	c.340+1G>A		1.52	9750.5	TRUE	9750.5	9586	153		10071	9904	157		9430	9268	149
K11_4					chr3	47059145	NM_014159.6	SETD2	c.7516A>G	p.Lys2506Glu	2.205	4322.5	TRUE	4322.5	4218.5	98		4862	4770	87		3783	3667	109
K11_4					chr3	52436662	NM_004656.3	BAP1	c.2012A>G	p.Tyr671Cys	1.96	9886.5	TRUE	9886.5	9653.5	194.5		10214	10007	170		9559	9300	219
K11_4					chrX	53223327	NM_004187.3	KDM5C	c.4003_4031del	p.Pro1335Alafs*2	1.27847	4414	FALSE	4334.5			59.5	4506			75	4163			44
K11_5	0.39899	6.698	7.114	10.47	chr3	10183872	NM_000551.3	VHL	c.340+1G>A		2.45	12273.5	TRUE	12273.5	11893.5	345.5		11383	10851	501		13164	12936	190
K11_5					chr3	47059145	NM_014159.6	SETD2	c.7516A>G	p.Lys2506Glu	4.655	3966.5	TRUE	3966.5	3729	215		3834	3691	124		4099	3767	306
K11_5					chr3	52436662	NM_004656.3	BAP1	c.2012A>G	p.Tyr671Cys	3.955	10225	TRUE	10225	9684.5	471.5		9150	8655	438		11300	10714	505
K11_5					chrX	53223327	NM_004187.3	KDM5C	c.4003_4031del	p.Pro1335Alafs*2	3.34	5961.5	TRUE	5576			162.5	5775			108	5377			217
K12_1	3.674	12.49	2.634	10.08	chr3	47098883	NM_014159.6	SETD2	c.6391C>T	p.Gln2131*	15.115	12176.5	TRUE	12176.5	10325	1804.5		11261	9690	1521		13092	10960	2088
K18_1	1.445	11.53	11.11	16.14	chr3	10191480	NM_000551.3	VHL	c.473T>C	p.Leu158Pro	6.255	5506	TRUE	5506	5084.5	375.5		5685	5201	433		5327	4968	318
K18_1					chr3	47155428	NM_014159.6	SETD2	c.4652delA	p.Asp1551Valfs*14	5.94	11005.5	TRUE	10470			608.5	8335			461	12605			756
K18_1					chr3	52649412	NM_018313.4	PBRM1	c.1879C>T	p.Pro627Ser	4.43733	14667	FALSE	14667	13955.5	587.5		13685	13002	569		15649	14909	606
K18_1					chr3	52649414	NM_018313.4	PBRM1	c.1846_1876del	p.Lys616Alafs*16	4.26901	14407.5	TRUE	14128			563	13148			525	15108			601
K18_2	1.44135	0	0	5.102	chr3	10191480	NM_000551.3	VHL	c.473T>C	p.Leu158Pro	2.52	6826.5	TRUE	6826	6602	171		7217	6993	165		6435	6211	177
K18_2					chr3	47155428	NM_014159.6	SETD2	c.4652delA	p.Asp1551Valfs*14	0.934616	14840	BAM only	14840			138	14487			164	15193			112
K18_2					chr3	52649412	NM_018313.4	PBRM1	c.1879C>T	p.Pro627Ser	1.18	18455.5	TRUE	18455.5	18108	202.5		19967	19613	181		16944	16603	224
K18_2					chr3	52649414	NM_018313.4	PBRM1	c.1846_1876del	p.Lys616Alafs*16	1.12	18547.5	TRUE	18342.5			170.5	19874			166	16811			175
K18_3	1.48591	0	0	3.01	chr3	10191480	NM_000551.3	VHL	c.473T>C	p.Leu158Pro	1.2507	6469	FALSE	6469	6334.5	83.5		6889	6690	143		6049	5979	24
K18_3					chr3	47155428	NM_014159.6	SETD2	c.4652delA	p.Asp1551Valfs*14	0.160807	14209.5	BAM only	14209.5			23	14065			8	14354			38
K18_3					chr3	52649412	NM_018313.4	PBRM1	c.1879C>T	p.Pro627Ser	0.582443	15579	BAM only	15579	15371	90		15932	15700	114		15226	15042	66
K18_3					chr3	52649414	NM_018313.4	PBRM1	c.1846_1876del	p.Lys616Alafs*16	0.490198	15525.5	BAM only	15525.5			76.5	15892			95	15159			58
K18_4	0.288109	0	0	3.137	chr3	10191480	NM_000551.3	VHL	c.473T>C	p.Leu158Pro	1.19124	6953.5	BAM only	6953.5	6820	80.5		7674	7538	82		6233	6102	79
K18_4					chr3	47155428	NM_014159.6	SETD2	c.4652delA	p.Asp1551Valfs*14	1.04848	11821.5	FALSE	11821.5			143.5	12856			228	10787			59
K18_4					chr3	52649412	NM_018313.4	PBRM1	c.1879C>T	p.Pro627Ser	0.715	16488	TRUE	16488	16219	135		18410	18138	137		14566	14300	133
K18_4					chr3	52649414	NM_018313.4	PBRM1	c.1846_1876del	p.Lys616Alafs*16	0.615	16534.5	TRUE	16413.5			110	18311			127	14516			93
K18_5	1.86944	0	1.803	0	chr3	10191480	NM_000551.3	VHL	c.473T>C	p.Leu158Pro	0.959819	5627.5	FALSE	5627.5	5501.5	78.5		5453	5259	153		5802	5744	4
K18_5					chr3	47155428	NM_014159.6	SETD2	c.4652delA	p.Asp1551Valfs*14	0.746849	15691.5	FALSE	15691.5			162.5	15640			252	15743			73
K18_5					chr3	52649412	NM_018313.4	PBRM1	c.1879C>T	p.Pro627Ser	0.619395	17246	FALSE	17246	18392	87		17246	17020	90		17246	19764	84
K18_5					chr3	52649414	NM_018313.4	PBRM1	c.1846_1876del	p.Lys616Alafs*16	0.505726	17291.5	FALSE	17291.5			64	17256			71	17327			57
K18_6	0.897885	0	1.456	0	chr3	10191480	NM_000551.3	VHL	c.473T>C	p.Leu158Pro	0.217787	7643.5	BAM only	7643.5	7567	17		7135	7070	8		8152	8064	26
K18_6					chr3	47155428	NM_014159.6	SETD2	c.4652delA	p.Asp1551Valfs*14	0	13920	BAM only	13920			0	13239			0	14601		0
K18_6					chr3	52649412	NM_018313.4	PBRM1	c.1879C>T	p.Pro627Ser	0.397486	18068	BAM only	18068	17861.5	66.5		16184	15953	101		19952	19770	32
K18_6					chr3	52649414	NM_018313.4	PBRM1	c.1846_1876del	p.Lys616Alafs*16	0.0226222	18065	BAM only	18065			0	16238			0	19892			9
K18_7	0.334173	0	0	0	chr3	10191480	NM_000551.3	VHL	c.473T>C	p.Leu158Pro	0.136252	8507	BAM only	8507	8436.5	11.5		8378	8298	11		8636	8575	12
K18_7					chr3	47155428	NM_014159.6	SETD2	c.4652delA	p.Asp1551Valfs*14	0	13419	BAM only	13419			0	12688			0	14150			0
K18_7					chr3	52649412	NM_018313.4	PBRM1	c.1879C>T	p.Pro627Ser	0.14263	21312	BAM only	21312	21123	30.5		21814	21621	47		20810	20625	14
K18_7					chr3	52649414	NM_018313.4	PBRM1	c.1846_1876del	p.Lys616Alafs*16	0.0296668	21376.5	BAM only	21376.5			6.5	21910			13	20843			0
K18_8	1.481	0	2.114	0	chr3	10191480	NM_000551.3	VHL	c.473T>C	p.Leu158Pro	0.286274	7829	BAM only	7829	7777.5	22.5		8032	7929	35		7626	7626	10
K18_8					chr3	47155428	NM_014159.6	SETD2	c.4652delA	p.Asp1551Valfs*14	0	11464.5	BAM only	11464.5			0	12085			0	10844			0
K18_8					chr3	52649412	NM_018313.4	PBRM1	c.1879C>T	p.Pro627Ser	0.103245	17084	BAM only	17084	16927.5	17.5		17268	17097	20		16900	16758	15
K18_8					chr3	52649414	NM_018313.4	PBRM1	c.1846_1876del	p.Lys616Alafs*16	0.00879013	17133.5	BAM only	17133.5			1.5	17334			1	16933			2
K18_9	2.532	0	0	1.731	chr3	10191480	NM_000551.3	VHL	c.473T>C	p.Leu158Pro	0.173834	9405.5	BAM only	9405.5	9312	16.5		10687	10579	21		8124	8045	12
K18_9					chr3	47155428	NM_014159.6	SETD2	c.4652delA	p.Asp1551Valfs*14	0.0236351	13873	BAM only	13873			3	15053			0	12693			6
K18_9					chr3	52649412	NM_018313.4	PBRM1	c.1879C>T	p.Pro627Ser	0.340712	19781	BAM only	19781	19556.5	64		21994	21749	48		17568	17364	80
K18_9					chr3	52649414	NM_018313.4	PBRM1	c.1846_1876del	p.Lys616Alafs*16	0.237108	19756.5	BAM only	19756.5			44.5	21902			28	17611			61
K18_10	1.477	0	0	1.975	chr3	10191480	NM_000551.3	VHL	c.473T>C	p.Leu158Pro	0.232248	6135	BAM only	6135	6072	14		5892	5830	16		6378	6314	12
K18_10					chr3	47155428	NM_014159.6	SETD2	c.4652delA	p.Asp1551Valfs*14	0.00710278	14178.5	BAM only	14178.5			1	14079			2	14278			0
K18_10					chr3	52649412	NM_018313.4	PBRM1	c.1879C>T	p.Pro627Ser	0.67664	18383	FALSE	18383	17804	86		18383	18051	145		18383	17557	27
K18_10					chr3	52649414	NM_018313.4	PBRM1	c.1846_1876del	p.Lys616Alafs*16	0.223388	18035.5	BAM only	18035.5			41	17709			1	18362			81
K18_11	1.855	0	0	1.82	chr3	10191480	NM_000551.3	VHL	c.473T>C	p.Leu158Pro	0.945102	8102.5	BAM only	8102.5	7961	76		8505	8327	96		7700	7595	56
K18_11					chr3	47155428	NM_014159.6	SETD2	c.4652delA	p.Asp1551Valfs*14	0.752279	13533.5	BAM only	13533.5			105	12660			49	14407			161
K18_11					chr3	52649412	NM_018313.4	PBRM1	c.1879C>T	p.Pro627Ser	0.177799	19634.5	BAM only	19634.5	19416.5	34.5		19638	19435	11		19631	19398	58
K18_11					chr3	52649414	NM_018313.4	PBRM1	c.1846_1876del	p.Lys616Alafs*16	0.0532643	19703	BAM only	19703			10.5	19693			0	19713			21
K18_12	2.61543	0	1.491	2.251	chr3	10191480	NM_000551.3	VHL	c.473T>C	p.Leu158Pro	0.808973	8099	BAM only	8099	7958.5	63.5		8283	8164	31		7915	7753	96
K18_12					chr3	47155428	NM_014159.6	SETD2	c.4652delA	p.Asp1551Valfs*14	0.39983	12386.5	BAM only	12386.5			46	13771			20	11002			72
K18_12					chr3	52649412	NM_018313.4	PBRM1	c.1879C>T	p.Pro627Ser	0.527296	19141	FALSE	19141	18855	93		19638	19409	63		18644	18301	123
K18_12					chr3	52649414	NM_018313.4	PBRM1	c.1846_1876del	p.Lys616Alafs*16	0.499833	19142	FALSE	19142			79.5	19654			53	18630			106
K18_13	1.27013	0	1.558	1.926	chr3	10191480	NM_000551.3	VHL	c.473T>C	p.Leu158Pro	0.262396	8308	BAM only	8308	8228.5	19.5		9813	6725	27		6803	9732	12
K18_13					chr3	47155428	NM_014159.6	SETD2	c.4652delA	p.Asp1551Valfs*14	0.0902236	14425.5	BAM only	14425.5			11.5	16228			1	12623			22
K18_13					chr3	52649412	NM_018313.4	PBRM1	c.1879C>T	p.Pro627Ser	0.210266	20434	BAM only	20434	20182	43		23337	23050	53		17531	17314	33
K18_13					chr3	52649414	NM_018313.4	PBRM1	c.1846_1876del	p.Lys616Alafs*16	0.12412	20444	BAM only	20444			26	23362			34	17526			18
K18_14	2.09809	0	0	0	chr3	10191480	NM_000551.3	VHL	c.473T>C	p.Leu158Pro	0.148998	6846.5	BAM only	6846.5	6802.5	24		6825	6737	17		6868	67896	31
K18_14					chr3	47155428	NM_014159.6	SETD2	c.4652delA	p.Asp1551Valfs*14	0.58	12215.5	FALSE	12215.5			30	12486			0	11945			60
K18_14					chr3	52649412	NM_018313.4	PBRM1	c.1879C>T	p.Pro627Ser	0.221565	18381	BAM only	18381	18295	41		17700	17528	19		19062	18821	63
K18_14					chr3	52649414	NM_018313.4	PBRM1	c.1846_1876del	p.Lys616Alafs*16	0.123561	18387	BAM only	18387			23.5	17755			0	19019			47
K18_15	2.96851	0	4.129	2.116	chr3	10191480	NM_000551.3	VHL	c.473T>C	p.Leu158Pro	0.679804	7990.5	BAM only	7990.5	7871	53.5		8003	7867	68		7978	7875	39
K18_15					chr3	47155428	NM_014159.6	SETD2	c.4652delA	p.Asp1551Valfs*14	0.519285	13899.5	FALSE	13899.5			68.5	13596			123	14203			14
K18_15					chr3	52649412	NM_018313.4	PBRM1	c.1879C>T	p.Pro627Ser	0.372543	20551	FALSE	20551	20277	75.5		20547	20239	97		20555	20315	54
K18_15					chr3	52649414	NM_018313.4	PBRM1	c.1846_1876del	p.Lys616Alafs*16	0.268624	20476.5	BAM only	20476.5			55	20470			70	20483			40
K18_16	2.55041	0	1.369	2.564	chr3	10191480	NM_000551.3	VHL	c.473T>C	p.Leu158Pro	1.20659	7598.5	FALSE	7598.5	7427.5	109		7284	7080	147		7913	7775	71
K18_16					chr3	47155428	NM_014159.6	SETD2	c.4652delA	p.Asp1551Valfs*14	0.744603	12001.5	FALSE	12001.5			128	12658			48	11345			208
K18_16					chr3	52649412	NM_018313.4	PBRM1	c.1879C>T	p.Pro627Ser	0.455706	17870	FALSE	17870	17623.5	100		17953	17687	126		17787	17560	74
K18_16					chr3	52649414	NM_018313.4	PBRM1	c.1846_1876del	p.Lys616Alafs*16	0.382137	17775.5	BAM only	17775.5			68	17845			87	17706			49
K20_1	-0.572	5.09	4.986	9.946	chr3	10183786	NM_000551.3	VHL	c.258delC	p.Val87Tyrfs*72	1.13296	17612	BAM only	17612			201.5	16203			161	19021			242
K20_1					chrX	53222496	NM_004187.3	KDM5C	c.4336C>A	p.His1446Asn	8.69	6035.5	TRUE	6035	5217	800		4851	4051	783		7219	6383	817
K20_2	-0.199759	0	4.313	10.74	chr3	10183786	NM_000551.3	VHL	c.258delC	p.Val87Tyrfs*72	3.605	13829.5	TRUE	13292			749	14969			453	11615			1045
K20_2					chrX	53222496	NM_004187.3	KDM5C	c.4336C>A	p.His1446Asn	8.49	8069	TRUE	8069	7170.5	880.5		9629	8576	1036		6509	5765	725
K20_3	2.79615	0	4.009	3.64	chr3	10183786	NM_000551.3	VHL	c.258delC	p.Val87Tyrfs*72	1.38387	13982.5	FALSE	13982.5			82.5	13789			59	14176			106
K20_3					chrX	53222496	NM_004187.3	KDM5C	c.4336C>A	p.His1446Asn	2.94807	5464	FALSE	5464	5329.5	121		5563	5424	124		5365	5235	118
K20_4	0.523227	0	2.07	4.995	chr3	10183786	NM_000551.3	VHL	c.258delC	p.Val87Tyrfs*72	2.09	12238.5	TRUE	12142.5			170	10732			132	13553			208
K20_4					chrX	53222496	NM_004187.3	KDM5C	c.4336C>A	p.His1446Asn	2.545	6699	TRUE	6699	6507	165.5		5276	5079	164		8122	7935	167
K21_1	-0.403	5.406	5.946	21.67	chr3	10191470	NM_000551.3	VHL	c.464-1G>T		7.3806	6025	BAM only	6024.5	5627	376		6240	6193	27		5809	5061	725
K21_2	0.308614	1.831	3.975	12.51	chr3	10191470	NM_000551.3	VHL	c.464-1G>T		0.416382	5022	BAM only	5022	4990	19		4452	4414	32		5592	5566	6
K21_3	0.474225	4.577	4.995	9.752	chr3	10191470	NM_000551.3	VHL	c.464-1G>T		1.4209	5822.5	BAM only	5822.5	5747.5	81		6257	6201	79		5388	5294	83
K21_4	0.992038	0	3.85	4.922	chr3	10191470	NM_000551.3	VHL	c.464-1G>T		0.694075	4015.5	BAM only	4015.5	3976	28		3881	3854	14		4150	4098	42
K21_5	0.571583	0	1.799	2.718	chr3	10191470	NM_000551.3	VHL	c.464-1G>T		0.300567	5604.5	BAM only	5604.5	5566.5	15		4822	4786	25		6387	6347	5
K21_6	0.14482	0	1.872	6.953	chr3	10191470	NM_000551.3	VHL	c.464-1G>T		0.279715	5821	BAM only	5821	5794	16		5916	5900	5		5726	5688	27
K21_7	2.466	5.548	6.497	12.61	chr3	10191470	NM_000551.3	VHL	c.464-1G>T		3.89	8816.5	TRUE	8816.5	8402.5	400.5		8471	8073	387		9162	8732	414
K23_1	-0.446	0	1.746	5.294	chrX	53253934	NM_004187.3	KDM5C	c.137delT	p.Ile46Thrfs*27	5.14	7741.5	TRUE	7314			427.5	8936		641		5692			214
K23_2	-0.0555256	0	1.677	1.654	chrX	53253934	NM_004187.3	KDM5C	c.137delT	p.Ile46Thrfs*27	0	3836.5	BAM only	3836.5			0	3552		0		4121			0
K23_3	0.274064	0	1.678	3.699	chrX	53253934	NM_004187.3	KDM5C	c.137delT	p.Ile46Thrfs*27	0	2736	BAM only	2736			0	3307		0		2165			0
K23_4	0.580101	0	1.726	2.038	chrX	53253934	NM_004187.3	KDM5C	c.137delT	p.Ile46Thrfs*27	0	2787.5	BAM only	2787.5			0	2544		0		3031			0
K23_5	-0.301205	0	1.663	4.419	chrX	53253934	NM_004187.3	KDM5C	c.137delT	p.Ile46Thrfs*27	0.375051	3983.5	BAM only	3983.5			15	3894		12		4073			18
K23_6	-0.450286	0	3.108	3.714	chrX	53253934	NM_004187.3	KDM5C	c.137delT	p.Ile46Thrfs*27	0.278506	3988.5	BAM only	3988.5			11.5	4185		20		3792			3
K23_7	-0.278189	0	4.06	4.402	chrX	53253934	NM_004187.3	KDM5C	c.137delT	p.Ile46Thrfs*27	0	3571.5	BAM only	3571.5			0	3422		0		3721			0
K23_8	-0.802976	0	1.847	4.584	chrX	53253934	NM_004187.3	KDM5C	c.137delT	p.Ile46Thrfs*27	0.267079	3565	BAM only	3565			9.5	3557		19		3573			0
K23_9	-0.452644	0	0	2.209	chrX	53253934	NM_004187.3	KDM5C	c.137delT	p.Ile46Thrfs*27	0	3330.5	BAM only	3330.5			0	3465		0		3196			0
K23_10	0.243442	0	1.941	2.116	chrX	53253934	NM_004187.3	KDM5C	c.137delT	p.Ile46Thrfs*27	0	3149.5	BAM only	3149.5			0	3208		0		3091			0
K27_1	1.005	8.145	8.368	11.58	chr3	47058741	NM_014159.6	SETD2	c.7537A>C	p.Thr2513Pro	5.315	2666	TRUE	2666	2471	178.5		2435	2191	229		2897	2751	128
K27_1					chr3	52713600	NM_018313.4	PBRM1	c.127dupA	p.Thr43Asnfs*10	4.435	10509	TRUE	10519.5			398.5	10446			426	10593			371
K27_2	0.590771	0	4.236	2.904	chr3	47058741	NM_014159.6	SETD2	c.7537A>C	p.Thr2513Pro	2.83266	1783	BAM only	1782.5	1708.5	48.5		1699	1635	44		1866	1782	53
K27_2					chr3	52713600	NM_018313.4	PBRM1	c.127dupA	p.Thr43Asnfs*10	1.33	10186	TRUE	10197.5			163.5	9703			169	10692			158
K27_3	2.83048	0	1.708	4.229	chr3	47058741	NM_014159.6	SETD2	c.7537A>C	p.Thr2513Pro	2.11836	5052	BAM only	1837				1874	1815	31		1800	1740	44
K27_3					chr3	52713600	NM_018313.4	PBRM1	c.127dupA	p.Thr43Asnfs*10	0.29609	8028	BAM only	11142.5				11483			68	10802			0
K27_4	0.98157	0	4.4489	5.764	chr3	47058741	NM_014159.6	SETD2	c.7537A>C	p.Thr2513Pro	5.00283	1425	BAM only	1425				1450	1368	54		1400	1304	79
K27_4					chr3	52713600	NM_018313.4	PBRM1	c.127dupA	p.Thr43Asnfs*10	1.745	9868	TRUE	9856.5			172	10112			202	9601			142
K27_5	1.31525	0	1.938	3.423	chr3	47058741	NM_014159.6	SETD2	c.7537A>C	p.Thr2513Pro	2.14616	5417	BAM only	2176.5				2130	2052	47		2223	2148	43
K27_5					chr3	52713600	NM_018313.4	PBRM1	c.127dupA	p.Thr43Asnfs*10	0.305672	8303	BAM only	11342.5				11898			22	10787			46
K27_6	4.10688	0	1.77	3.719	chr3	47058741	NM_014159.6	SETD2	c.7537A>C	p.Thr2513Pro	2.32882	2203	BAM only	2203				2489	2404	52		1917	1844	46
K27_6					chr3	52713600	NM_018313.4	PBRM1	c.127dupA	p.Thr43Asnfs*10	1.375	12107	TRUE	12074			124	12470			84	11678			164
K27_7	5.33246	8.139	7.503	9.908	chr3	47058741	NM_014159.6	SETD2	c.7537A>C	p.Thr2513Pro	5.19393	1856	BAM only	1856				2040	1920	91		1672	1558	88
K27_7					chr3	52713600	NM_018313.4	PBRM1	c.127dupA	p.Thr43Asnfs*10	4.965	9942	TRUE	9933.5			441.5	10207			439	9660			444
K27_8	1.22234	0	1.904	4.235	chr3	47058741	NM_014159.6	SETD2	c.7537A>C	p.Thr2513Pro	2.33205	5605	BAM only	2146.5				2345	2263	50		1948	1874	46
K27_8					chr3	52713600	NM_018313.4	PBRM1	c.127dupA	p.Thr43Asnfs*10	0.0559061	7737	BAM only	10631.5				12521			14	8742			0
K35_1	0.343669	0	1.584	2.223	chr3	10188254	NM_000551.3	VHL	c.397A>C	p.Thr133Pro	0.305038	9775	BAM only	9775	9658	29.5		9142	9041	27		10408	10275	32
K35_1					chr3	52692265	NM_018313.4	PBRM1	c.594delT	p.Pro199Hisfs*25	0.0419757	14291.5	BAM only	14291.5			6	14294			12	14289			0
K35_1					chr17	7577120	NM_000546.5	TP53	c.818G>T	p.Arg273Leu	0.725969	12251	BAM only	12251	12133.5	88.5		12434	12294	121		12068	11973	56
K35_2	2.18176	12.18	7.222	10.78	chr3	10188254	NM_000551.3	VHL	c.397A>C	p.Thr133Pro	6.33	10387.5	TRUE	10387.5	9624	673		10579	9783	713		10196	9465	633
K35_2					chr3	52692265	NM_018313.4	PBRM1	c.594delT	p.Pro199Hisfs*25	6.425	15897.5	TRUE	14583			1226	13363			1190	15803			1262
K35_2					chr17	7577120	NM_000546.5	TP53	c.818G>T	p.Arg273Leu	2.70758	20269.5	FALSE	20269.5	19540.5	662		19307	18497	726		21232	20584	598
K35_3	0.0067971	0	1.67	1.557	chr3	10188254	NM_000551.3	VHL	c.397A>C	p.Thr133Pro	0.405123	10698.5	BAM only	10698.5	10531	43.5		11108	10855	72		10289	10207	15
K35_3					chr3	52692265	NM_018313.4	PBRM1	c.594delT	p.Pro199Hisfs*25	0.00967212	20753	BAM only	20753			2	20678			4	20828			0
K35_3					chr17	7577120	NM_000546.5	TP53	c.818G>T	p.Arg273Leu	0.1895	21501.5	BAM only	21501.5	21415	39.5		23287	23210	30		19716	19620	49
K35_4	-0.253801	0	1.687	1.729	chr3	10188254	NM_000551.3	VHL	c.397A>C	p.Thr133Pro	0.061816	10603	BAM only	10603	10503	6.5		10815	10716	7		10391	10290	6
K35_4					chr3	52692265	NM_018313.4	PBRM1	c.594delT	p.Pro199Hisfs*25	0.0391876	21536.5	BAM only	21536.5			8.5	21240			4	21833			13
K35_4					chr17	7577120	NM_000546.5	TP53	c.818G>T	p.Arg273Leu	0.312136	19741	BAM only	19741	19604	59.5		20547	20451	23		18935	18757	96
K35_5	-0.229853	0	1.7995	1.835	chr3	10188254	NM_000551.3	VHL	c.397A>C	p.Thr133Pro	0.0825382	10997.5	BAM only	10997.5	10888.5	9		12056	11939	10		9939	9838	8
K35_5					chr3	52692265	NM_018313.4	PBRM1	c.594delT	p.Pro199Hisfs*25	0.0408609	21655	BAM only	21655			9	22559			13	20751			5
K35_5					chr17	7577120	NM_000546.5	TP53	c.818G>T	p.Arg273Leu	0.29142	20150.5	BAM only	20150.5	20060.5	60		22229	22120	81		18072	18001	39
K35_6	0.329539	0	1.804	2.713	chr3	10188254	NM_000551.3	VHL	c.397A>C	p.Thr133Pro	0.256603	11231.5	BAM only	11231.5	11123	28.5		11178	11062	36		11285	11184	21
K35_6					chr3	52692265	NM_018313.4	PBRM1	c.594delT	p.Pro199Hisfs*25	0.01366	22042	BAM only	22042			3	22122			0	21962			6
K35_6					chr17	7577120	NM_000546.5	TP53	c.818G>T	p.Arg273Leu	0.41026	21062	BAM only	21062	20931	86		20880	20755	70		21244	21107	102
K35_7	0.633657	0	1.723	3.954	chr3	10188254	NM_000551.3	VHL	c.397A>C	p.Thr133Pro	0.110189	11017.5	BAM only	11017.5	10898.5	12		10990	10851	14		11045	10946	10
K35_7					chr3	52692265	NM_018313.4	PBRM1	c.594delT	p.Pro199Hisfs*25	0.0272372	19551.5	BAM only	19551.5			5.5	20193			11	18910			0
K35_7					chr17	7577120	NM_000546.5	TP53	c.818G>T	p.Arg273Leu	1.045	18534.5	TRUE	18534.5	18210	296		17926	17759	141		19143	18661	451
K39_1	3.27721	17.22	15.52	23.11	chr3	10191613	NM_000551.3	VHL	c.606_607insT	p.Gln203Serfs*53	13.325	7521	TRUE	7417			1007	7929			1067	6905			947
K39_1					chr3	47158137	NM_014159.6	SETD2	c.4562T>G	p.Leu1521Arg	17.525	6631	TRUE	6631	23436.5	1429.5		5558	40574	1482		7704	6299	1377
K39_1					chr3	52439294	NM_004656.3	BAP1	c.947_948insTC	p.Ala317Argfs*19	11.885	9415.5	TRUE	9179			1239.5	8800			1125	9558			1354
K39_2	9.21297	17.82	15.14	23.41	chr3	10191613	NM_000551.3	VHL	c.606_607insT	p.Gln203Serfs*53	17.68	5382.5	TRUE	5313			1005	4984			845	5642			1165
K39_2					chr3	47158137	NM_014159.6	SETD2	c.4562T>G	p.Leu1521Arg	21.68	7904.5	TRUE	7904.5	6173.5	1696		6427	4987	1416		9382	7360	1976
K39_2					chr3	52439294	NM_004656.3	BAP1	c.947_948insTC	p.Ala317Argfs*19	15.775	7690.5	TRUE	7667.5			1326	7248			1137	8087			1515
K39_3	5.64291	10.84	12.83	17.39	chr3	10191613	NM_000551.3	VHL	c.606_607insT	p.Gln203Serfs*53	15.73	5828.5	TRUE	6324.5			943.5	6112			716	6537			1171
K39_3					chr3	47158137	NM_014159.6	SETD2	c.4562T>G	p.Leu1521Arg	18.285	7802.5	TRUE	8888	7577	1266		8599	7280	1271		9177	7874	1261
K39_3					chr3	52439294	NM_004656.3	BAP1	c.947_948insTC	p.Ala317Argfs*19	12.7	8229	TRUE	8527			1164	7903			1455	9151			873
K42_1	1.48156	0	0	2.395	chr1	11273502	NM_004958.3	MTOR	c.3239G>A	p.Arg1080His	3.455	10266	TRUE	10266	9821.5	382.5		7498	7267	182		13034	12376	583
K42_2	0.214479	0	2.054	3.515	chr1	11273502	NM_004958.3	MTOR	c.3239G>A	p.Arg1080His	4.37	8234	TRUE	8234	7745	364		7640	7200	318		8828	8290	410
K42_3	0.384113	0	1.98	2.253	chr1	11273502	NM_004958.3	MTOR	c.3239G>A	p.Arg1080His	4.58	8304	TRUE	8303.5	7759	411		9024	8330	538		7583	7188	284
K42_4	0.494311	0	1.763	4.012	chr1	11273502	NM_004958.3	MTOR	c.3239G>A	p.Arg1080His	4.655	8639.5	TRUE	8639.5	8126.5	374.5		8764	8342	282		8515	7911	467
